# Supplementary material
Source: Elsevier journal article supplement (https://www.sciencedirect.com/science/article/pii/S0300893221000518)
Supplement: mmc1 [file S0300893221000518:mmc1.pdf]

## **SUPPLEMENTARY DATA**

### **METHODS OF THE SUPPLEMENTARY DATA**

#### **Inclusion and exclusion criteria**

##### **Inclusion criteria:**

- Patients > 18 years with STEMI < 12 hours undergoing primary percutaneous coronary intervention.
- ST-segment elevation of > 1 mm in > 2 contiguous leads, or (presumably new) left bundle branch block, or true posterior myocardial infarction with ST depression of > 1 mm in > 2 contiguous anterior leads.
- Presence of at least 1 acute infarct artery target vessel with 1 or more de novo coronary artery stenosis in a native coronary artery within 2.75–3.75 mm reference vessel diameter and < 24 mm length (visually estimated).
- Participant agrees to not participate in any other investigational or invasive clinical study for a period of 12 months following the index procedure.

##### **Exclusion criteria:**

- Inability to provide informed consent.
- Woman of childbearing potential, who did not undergo tubal ligation, ovariectomy or hysterectomy.
- Known intolerance to aspirin, heparin, bioresorbable polymers, everolimus, or contrast material.

- Cardiogenic shock or mechanical complications of acute myocardial infarction.
- Unprotected left main coronary artery stenosis.
- Significant angiographic lesion located distally to the target lesion.
- Acute myocardial infarction secondary to stent thrombosis.
- Severe tortuous calcified or angulated coronary anatomy of the study vessel that in the opinion of the investigator would result in suboptimal imaging or excessive risk of complications in the follow-up procedure.
- Active bleeding or coagulopathy or patients under chronic anticoagulation therapy.
- Chronic renal dysfunction with creatinine clearance < 45 mL/min.
- Participant is currently participating in another clinical trial that has not yet completed its primary endpoint.

### **Vasomotor test**

Patients were requested to stop all vasomotor drugs at least 24 hours before coronary angiography. Nonstudy vasomotor drugs were also not allowed before the vasomotor test. Operators were requested to repeat the same angiographic views as in the index procedure. A conventional workhorse guidewire was advanced up to the stent segment. Then, a single lumen microcatheter (Teleport, OrbusNeich, United States) was positioned 5-mm proximal to the stent edge.

The endothelial-dependent function test was then performed by the infusion of intracoronary acetylcholine M<sup>6</sup> via microcatheter using an infusion pump. Intracoronary acetylcholine was infused at 2 mL/min for 2 minutes. A cine-fluoroscopy was performed at the end of the infusion and was properly labeled. In the absence of vasospasm (> 90% diameter stenosis and symptoms)

or atrioventricular block, and after a washout period of 2 mm, the following incremental dose of acetylcholine (acetylcholine  $M^{-4}$ ) was given and properly recorded with cine-fluoroscopy.

The endothelial independent function test was performed with at least 200  $\mu$ g of intracoronary nitroglycerin via the guiding catheter after removal of all intracoronary material. A cine-fluoroscopy recording was then performed and properly labeled.

### **Quantitative optical coherence tomography analysis**

Quantitative optical coherence tomography analysis was performed each 1 mm according to standard core-laboratory procedures using the specific offline software (LightLab Imaging, United States). In summary, the software drew the lumen contour automatically of all proximal stent and distal segments. Stent contour was performed semiautomatically by pointing the inner strut surface of the stent struts. Taking into account the different strut thickness of the bioactive sirolimus-eluting stent (100  $\mu$ m) and polymer-free biolimus-eluting stent (112  $\mu$ m) and the optical coherence tomography axial resolution (15  $\mu$ m); strut malapposition was defined as distances between the inner strut surface and the lumen contour  $\geq 120$   $\mu$ m for bioactive sirolimus-eluting stent and  $\geq 130$   $\mu$ m for polymer-free biolimus-eluting stent.

**Table 1 of the supplementary data**

Comparison of the angiographic lumen and diameter stenosis of current drug-eluting stents

| Device type                | Device     | Trial               | Publication year | Mean LLL    | SD of LLL   | Lesions with DS $\geq$ 50% (%) | Month angiographic FU | Number of lesions |
|----------------------------|------------|---------------------|------------------|-------------|-------------|--------------------------------|-----------------------|-------------------|
| <b>Durable polymer DES</b> | XIENCE     | SPIRIT II           | 2006             | 0.11        | 0.27        | 1.3                            | 6                     | 201               |
|                            | Xience     | SPIRIT III          | 2009             | 0.16        | 0.41        | 2.3                            | 8                     | 669               |
|                            | XIENCE     | Resolute AC         | 2010             | 0.19        | 0.40        | 3.8                            | 13                    | 177               |
|                            | XIENCE     | ESSENCE-DIABETES    | 2011             | 0.11        | 0.26        | 0.0                            | 8                     | 149               |
|                            | XIENCE     | EXCELLENT           | 2011             | 0.19        | 0.35        | 2.0                            | 9                     | 708               |
|                            | XIENCE     | LONG-DES-III        | 2011             | 0.22        | 0.42        | 3.9                            | 9                     | 224               |
|                            | XIENCE     | RESET               | 2012             | 0.16        | 0.36        | 5.1                            | 8                     | 274               |
|                            | XIENCE     | NEXT                | 2013             | 0.14        | 0.36        | 7.5                            | 8                     | 293               |
|                            | XIENCE     | ABSORB JAPAN        | 2015             | 0.16        | 0.33        | 1.6                            | 13                    | 129               |
|                            | XIENCE     | BIOFLOW II          | 2015             | 0.11        | 0.29        | 1.3                            | 9                     | 149               |
|                            | XIENCE     | CENTURY II          | 2016             | 0.18        | 0.31        | NR                             | 9                     | 237               |
|                            | XIENCE     | TROFI II            | 2016             | 0.08        | 0.28        | 1.1                            | 6                     | 98                |
|                            | XIENCE     | RESEVOIR            | 2016             | 0.24        | 0.57        | 4.0                            | 9                     | 50                |
|                            | XIENCE     | PRISON IV           | 2017             | 0.07        | 0.46        | 2.1                            | 9                     | 143               |
|                            | XIENCE     | NeoVas              | 2018             | 0.16        | 0.28        | 1.6                            | 12                    | 245               |
|                            | XIENCE     | Merit V             | 2018             | 0.15        | 0.29        | NR                             | 9                     | 70                |
|                            | XIENCE     | TARGET              | 2018             | 0.11        | 0.52        | 4.4                            | 13                    | 90                |
|                            | XIENCE     | HARMONEE            | 2018             | 0.22        | 0.35        | NR                             | 12                    | 80                |
|                            | XIENCE     | LONG-DES VI         | 2019             | 0.27        | 0.35        | 5.3                            | 12                    | 76                |
|                            | XIENCE     | BVS-FLOW            | 2020             | 0.11        | 0.16        | 0.0                            | 13                    | 30                |
|                            | XIENCE     | BIOFLOW VI          | 2020             | 0.07        | 0.22        | 0.5                            | 9                     | 220               |
|                            | Resolute   | Resolute AC         | 2010             | 0.27        | 0.43        | 4.2                            | 13                    | 183               |
|                            | Resolute   | ISAR-TEST-5         | 2011             | 0.29        | 0.56        | NR                             | 6                     | 1131              |
|                            | Resolute   | LONG-DES IV         | 2012             | 0.26        | 0.36        | 4.0                            | 7                     | 250               |
|                            | Resolute   | ESSENCE-DIABETES II | 2013             | 0.22        | 0.29        | 1.2                            | 9                     | 127               |
|                            | Resolute   | Resolute China      | 2013             | 0.16        | 0.38        | 2.5                            | 9                     | 264               |
|                            | Resolute   | DIRECT II           | 2016             | 0.13        | 0.27        | 0.0                            | 6                     | 40                |
|                            | Resolute   | Bionics             | 2017             | 0.23        | 0.39        | 7.5                            | 13                    | 96                |
|                            | Resolute   | ORIENT              | 2017             | 0.16        | 0.39        | 1.3                            | 9                     | 77                |
|                            | Resolute   | PIONEER             | 2017             | 0.14        | 0.37        | 4.4                            | 9                     | 101               |
|                            | Resolute   | LONG-DES VI         | 2019             | 0.33        | 0.50        | 8.1                            | 12                    | 74                |
|                            | <b>ALL</b> | <b>ALL</b>          | <b>-</b>         | <b>0.17</b> | <b>0.36</b> | <b>2.9</b>                     | <b>6 to 13</b>        | <b>6655</b>       |

|                           |                   |                |      |             |             |            |                |             |
|---------------------------|-------------------|----------------|------|-------------|-------------|------------|----------------|-------------|
| Bioresorbable polymer DES | Supraflex         | PIONEER        | 2017 | 0.29        | 0.33        | 3.3        | 9              | 95          |
|                           | Orsiro            | BIOFLOW II     | 2015 | 0.10        | 0.32        | 2.2        | 9              | 278         |
|                           | Orsiro            | ORIENT         | 2017 | 0.10        | 0.35        | 1.7        | 9              | 180         |
|                           | Orsiro            | PRISON IV      | 2017 | 0.12        | 0.59        | 8.0        | 9              | 138         |
|                           | Orsiro            | MAGSTEMI       | 2019 | 0.06        | 0.21        | 0.0        | 12             | 76          |
|                           | Orsiro            | BIOFLOW VI     | 2020 | 0.05        | 0.21        | 0.4        | 9              | 224         |
|                           | SYNERGY           | EVOLVE         | 2012 | 0.10        | 0.25        | 0.0        | 6              | 94          |
|                           | SYNERGY           | EVOLVE II QCA  | 2015 | 0.22        | 0.23        | 1.8        | 9              | 110         |
|                           | SYNERGY           | EVOLVE China   | 2017 | 0.20        | 0.32        | 2.0        | 9              | 195         |
|                           | Biomine           | Merit V        | 2018 | 0.15        | 0.27        | NR         | 9              | 146         |
|                           | Firehawk          | TARGET         | 2018 | 0.17        | 0.48        | 6.4        | 13             | 94          |
|                           | Ultimaster        | CENTURY II     | 2016 | 0.26        | 0.35        | NR         | 9              | 247         |
|                           | <b>ALL</b>        | <b>ALL</b>     | -    | <b>0.15</b> | <b>0.33</b> | <b>2.6</b> | <b>9 to 13</b> | <b>1877</b> |
| Polymer-free DES          | BioFreedom        | BIOFREEDOM FIM | 2016 | 0.17        | NR          | 6.7        | 12             | 31          |
|                           | BioFreedom        | BIOFREEDOM USA | 2017 | 0.32        | 0.53        | 6.2        | 9              | 66          |
|                           | BioFreedom        | EGO-BIOFREEDOM | 2018 | 0.21        | 0.30        | NR         | 9              | 110         |
|                           | <b>BioFreedom</b> | <b>ALL</b>     | -    | <b>0.23</b> | <b>0.42</b> | <b>6.5</b> | <b>9 to 12</b> | <b>207</b>  |
| Bioactive DES             | COMBO             | REMEDEE        | 2013 | 0.39        | 0.45        | 5.5        | 9              | 109         |
|                           | COMBO             | EGO-COMBO      | 2016 | 0.23        | 0.36        | 1.6        | 9              | 74          |
|                           | COMBO             | HARMONEE       | 2018 | 0.29        | 0.44        | 1.3        | 12             | 86          |
|                           | <b>COMBO</b>      | <b>ALL</b>     | -    | <b>0.30</b> | <b>0.42</b> | <b>2.8</b> | <b>9 to 12</b> | <b>269</b>  |

DES, drug-eluting stents; DS, diameter stenosis; FU, follow-up; NR, not reported; LLL, late lumen

loss; SD, standard deviation.

Table 2 of the supplementary data

Comparison of the vasomotor function of different DES in STEMI patients

|                                                       | Stent type          | Bioactive SES<br>(n = 25; 6-m<br>FU) | Polymer-free<br>BES<br>(n = 24; 6-m FU) | Bioresorbable<br>polymer SES <sup>1</sup><br>(n = 35; 1-y FU) | Durable<br>polymer EES <sup>2</sup><br>(n = 16; 3-y FU) |
|-------------------------------------------------------|---------------------|--------------------------------------|-----------------------------------------|---------------------------------------------------------------|---------------------------------------------------------|
| Distal segment length,<br>mm                          | Baseline            | 30.93 ± 6.40                         | 30.92 ± 8.52                            | 33.77 ± 5.37                                                  | 32.01 ± 5.95                                            |
|                                                       | Ach M <sup>-6</sup> | 31.36 ± 6.54                         | 30.87 ± 9.07                            | 33.93 ± 6.11                                                  | 32.19 ± 6.09                                            |
|                                                       | Ach M <sup>-4</sup> | 30.83 ± 6.50                         | 31.67 ± 8.39                            | 33.37 ± 7.71                                                  | 32.24 ± 5.42                                            |
|                                                       | Nitroglycerin       | 30.97 ± 6.43                         | 30.76 ± 8.15                            | 33.92 ± 5.41                                                  | 32.30 ± 5.69                                            |
| Minimal lumen diameter.<br>mm<br>(relative change, %) | Baseline            | 1.67 ± 0.41                          | 1.59 ± 0.33                             | 1.44 ± 0.43                                                   | 1.40 ± 0.24                                             |
|                                                       | Ach M <sup>-6</sup> | 1.53 ± 0.62<br>(-8.1 ± 27.6)         | 1.42 ± 0.52<br>(-11.6 ± 24.1)           | 1.23 ± 0.51<br>(-15.3 ± 19.5)                                 | 1.39 ± 0.39<br>(-0.4 ± 20.3)                            |
|                                                       | Ach M <sup>-4</sup> | 1.27 ± 0.59<br>(-24.9 ± 24.9)        | 1.19 ± 0.54<br>(-24.9 ± 29.3)           | 1.01 ± 0.43<br>(-28.7 ± 24.1)                                 | 1.12 ± 0.46<br>(-21.1 ± 23.4)                           |
|                                                       | Nitroglycerin       | 1.83 ± 0.48<br>(10.8 ± 16.4)         | 1.79 ± 0.39<br>(13.8 ± 15.3)            | 1.59 ± 0.48<br>(12.1 ± 20.4)                                  | 1.53 ± 0.33<br>(9.8 ± 15.4)                             |
| Mean lumen diameter.<br>mm<br>(relative change, %)    | Baseline            | 2.18 ± 0.47                          | 2.09 ± 0.37                             | 1.96 ± 0.42                                                   | 1.84 ± 0.32                                             |
|                                                       | Ach M <sup>-6</sup> | 2.00 ± 0.65<br>(-8.3 ± 20.1)         | 1.94 ± 0.46<br>(-7.6 ± 14.2)            | 1.8 ± 0.48<br>(-8.3 ± 12.6)                                   | 1.89 ± 0.34<br>(3.3 ± 11.8)                             |
|                                                       | Ach M <sup>-4</sup> | 1.84 ± 0.65<br>(-16.0 ± 20.2)        | 1.75 ± 0.54<br>(-16.1 ± 21.6)           | 1.61 ± 0.47<br>(-18.1 ± 15.4)                                 | 1.68 ± 0.43<br>(-8.7 ± 14.8)                            |
|                                                       | Nitroglycerin       | 2.38 ± 0.52<br>(9.7 ± 9.5)           | 2.31 ± 0.36<br>(11.2 ± 8.7)             | 2.20 ± 0.46<br>(13.5 ± 13.2)                                  | 2.07 ± 0.39<br>(13.1 ± 11.4)                            |

Ach, acetylcholine; BES, biolimus-eluting stent; DES, drug-eluting stent; FU, follow-up; SES, sirolimus-eluting stent; STEMI, ST-elevation myocardial infarction.

-

Gómez-Lara, et al. Coronary endothelial and microvascular function distal to polymer-free and endothelial cell-capturing drug-eluting stents. The randomized FUNCOMBO trial

#### REFERENCES OF THE SUPPLEMENTARY DATA

1. Sabate M, Alfonso F, Cequier A, et al. Magnesium-Based Resorbable Scaffold Versus Permanent Metallic Sirolimus-Eluting Stent in Patients With ST-Segment Elevation Myocardial Infarction: The MAGSTEMI Randomized Clinical Trial. *Circulation*. 2019;140:1904-1916.
2. Gomez-Lara J, Brugaletta S, Ortega-Paz L, et al. Long-Term Coronary Functional Assessment of the Infarct-Related Artery Treated With Everolimus-Eluting Bioresorbable Scaffolds or Everolimus-Eluting Metallic Stents: Insights of the TROFI II Trial. *JACC Cardiovasc Interv*. 2018;11:1559-1571.
